# Supplementary material for: Noticias artísticas de protocolos vallisoletanos
Source: Royal Society of Chemistry journal article supplement (doi:10.1039/c7an01102d), 1973-01-01
Supplement: c7an01102d1.pdf [file c7an01102d1.pdf]

Electronic supplementary information

## **Simple and rapid colorimetric detection of melanoma circulating tumor cells with bifunctional magnetic nanoparticles**

Junrong Li,<sup>a†</sup> Jing Wang,<sup>a†</sup> Yuling Wang<sup>b\*</sup> and Matt Trau<sup>a,c\*</sup>

<sup>a</sup>Centre for Personalized Nanomedicine, Australian Institute for Bioengineering and Nanotechnology (AIBN), The University of Queensland, Brisbane, QLD 4072, Australia

<sup>b</sup>Department of Molecular Sciences, ARC Centre of Excellence for Nanoscale BioPhotonics, Faculty of Science and Engineering, Macquarie University, Sydney, NSW 2109, Australia

<sup>c</sup>School of Chemistry and Molecular Biosciences, The University of Queensland, Brisbane, QLD 4072, Australia

E-mail: yuling.wang@mq.edu.au; m.trau@uq.edu.au

†These two authors contributed equally.

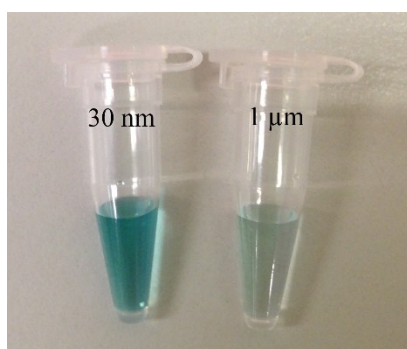

**Fig. S1.** Nanozyme activities of 30 nm and 1 μm magnetic nanoparticles, respectively.

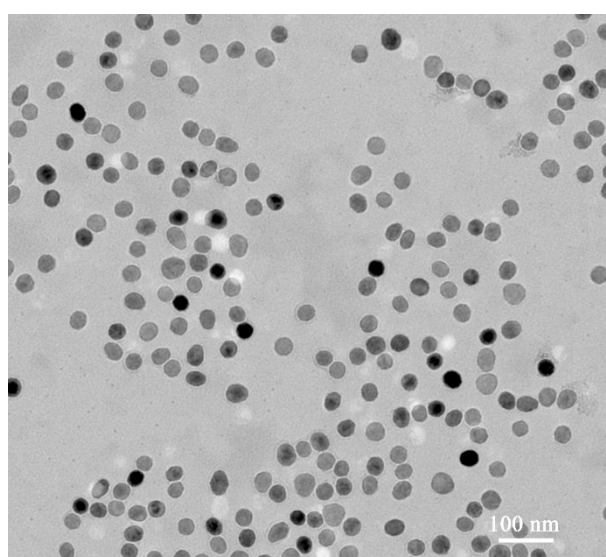

**Fig. S2.** TEM image of MNPs

**Table S1.** Capture efficiency and nonspecific binding from spiked cells in PBS solution

|            | Spiked | Detected<br>1 | Detected<br>2 | Detected<br>3 | Average Recovery (%) | RSD (%) |
|------------|--------|---------------|---------------|---------------|----------------------|---------|
| LM-MEL-33  | 1000   | 673           | 771           | 662           | 70.20                | 6.00    |
| MDA-MB-231 | 10000  | 360           | 260           | 233           | 2.84                 | 0.67    |

$$\text{Capture efficiency} = \frac{\text{Number of detected positive cells}}{\text{Number of spiked positive cells}} \times 100\%$$

$$\text{Non-specific recovery} = \frac{\text{Number of detected negative cells}}{\text{Number of spiked negative cells}} \times 100\%$$

Positive cells: LM-MEL-33

Negative cells: MDA-MB-231

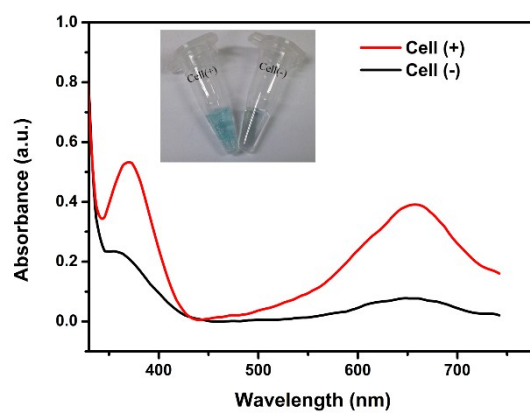

**Fig. S3.** Cells alone in catalyzing TMB in the presence of  $\text{H}_2\text{O}_2$ . Cell (+):  $10^6$  cell, Cell (-): 0 cell.

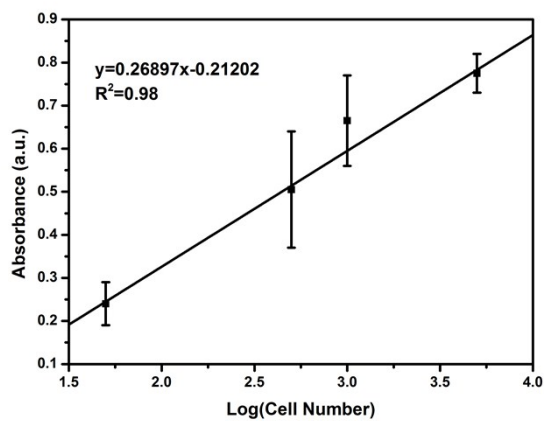

**Fig. S4.** The absorbance at 652 nm against natural logarithm over the different numbers of LM-MEL-33 cells in 7.5 mL of blood samples.
